# Supplementary material for: In situ synthesis of highly dispersed Co–N–C catalysts with carbon-coated sandwich structures based on defect anchoring
Source: Royal Society of Chemistry journal article supplement (doi:10.1039/d0nj00213e), 2020-01-01
Supplement: d0nj00213e2.pdf [file d0nj00213e2.pdf]

## Supporting Information

### **In-situ synthesis of highly dispersed Co-N-C catalysts with carbon-coated sandwich structure based on defect anchoring**

Suisheng Li, Lushuang Zhang, Shanshan Jie, Zhigang Liu\*

State Key Laboratory of Chemo/Biosensing and Chemometrics, School of Chemistry and Chemical Engineering, Hunan University, Changsha 410082, China

\* E-mail: [liuzhigang@hnu.edu.cn](mailto:liuzhigang@hnu.edu.cn)

### **Table of Contents**

1. Experimental
2. Characterization and results

## 1. Experimental

### 1.1 Catalyst Characterization

Nitrogen adsorption-desorption isotherms were measured on Nova 1000e apparatus from Quanta Chrome Instruments at 77 K. The samples were outgassed at 200 °C for 3 h prior to the measurements. In the relative pressure ranging from 0.05 to 0.98, the specific surface areas ( $S_{\text{BET}}$ ), the mesoporous volume ( $V_{\text{tot}}$ ) and pore size ( $D_{\text{p}}$ ) distribution were calculated using the Brunauer-Emmett-Teller (BET) and the Barrett-Joyner-Halenda (BJH) formula. Raman was conducted on Mono Vista 2560 Spectrometer with a 532 nm (2.33 eV) laser. High-resolution transmission electron microscope (HRTEM, JEOL-2100F) operating at 200 kV was carried to measure the morphology of samples. The mapping was conducted to determine the local elemental composition. X-ray photoelectron spectroscopy (XPS) was measured on a PHI 5000 CESCAs system (Perkin Elmer) using Al  $K\alpha$  radiation (1486.6 eV). The X-ray diffraction (XRD) analysis was performed on a Japan XRD-6100 analyzer using Ni-filtered Cu  $K\alpha$  radiation with a scanning angle ( $2\theta$ ) ranging from 10°-80°, operated at 50 kV and 10 mA.

## 2. Characterization and results

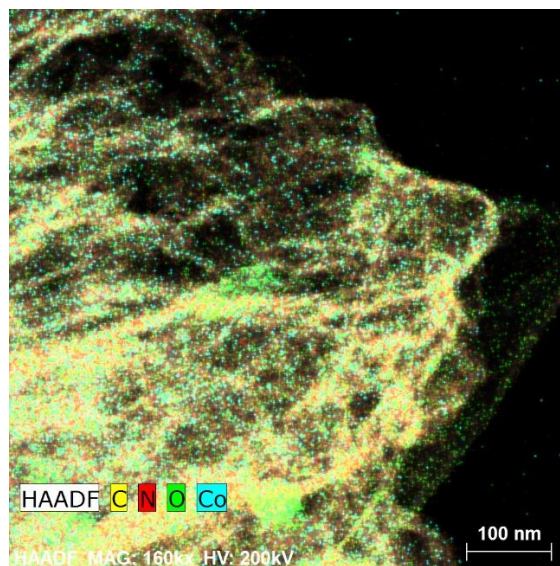

**Fig. S1.** HAADF-STEM image of Co-N-C-20.

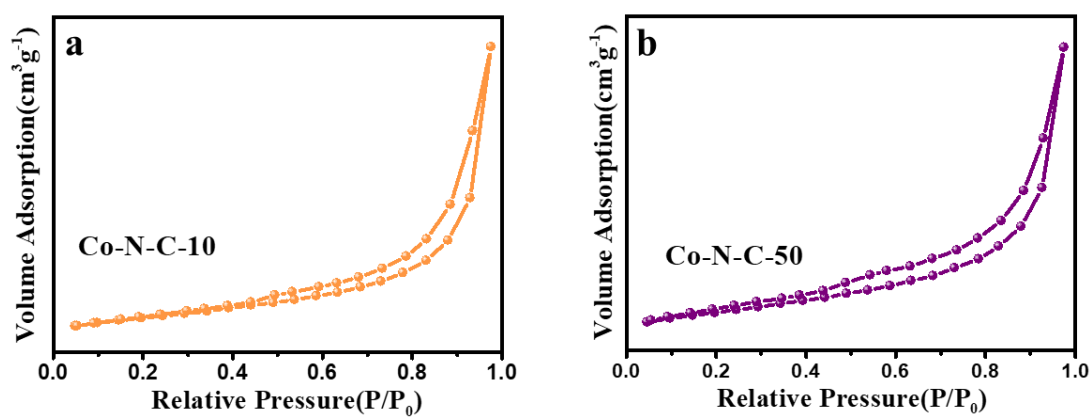

**Fig. S2.** Nitrogen adsorption–desorption isotherms of Co-N-C-10 and Co-N-C-50.

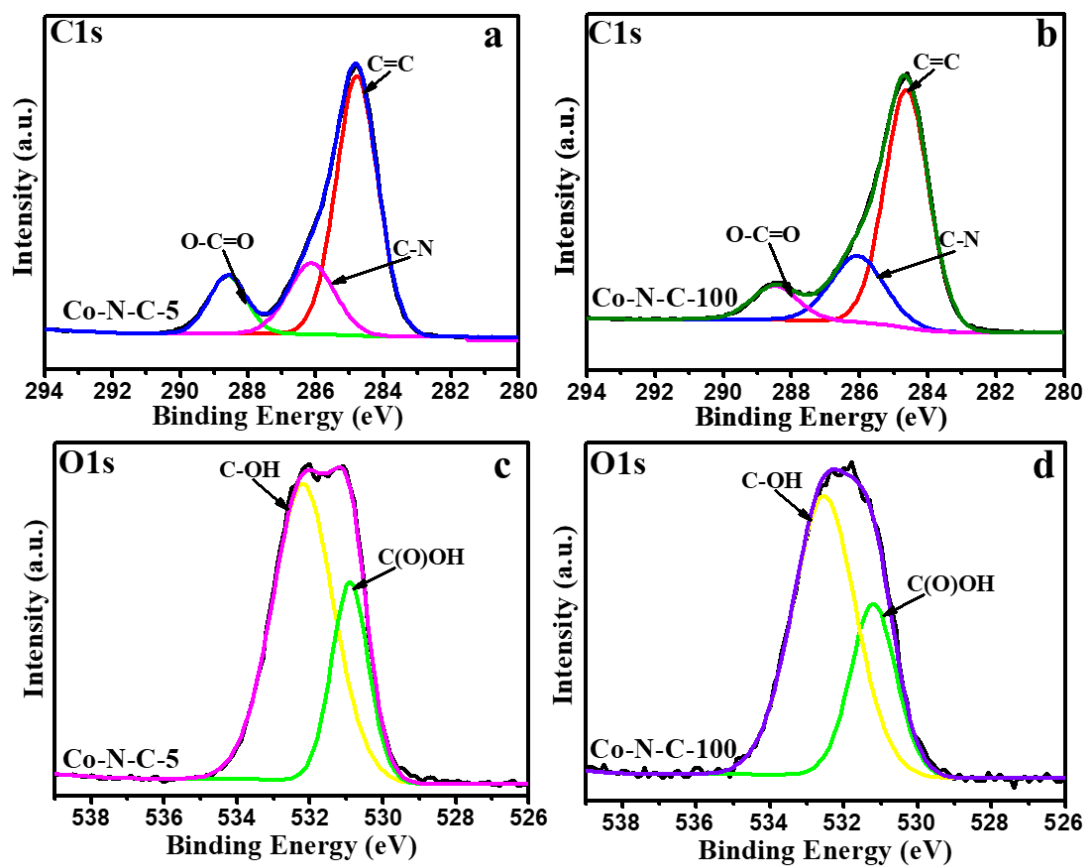

**Fig. S3.** XPS spectra of as-prepared catalysts. (a) C 1s XPS spectrum and (c) O 1s XPS spectrum of the sample Co-N-C-5; (b) C 1s XPS spectrum and (d) O 1s XPS spectrum of the sample Co-N-C-100.

**Table S1** Quantitative XPS analysis for Co-N-C-100, Co-N-C-20 and Co-N-C-5.

| Catalyst   | C(at%) | O(at%) | N(at%) |             |            |             |           | Co(at%) | Co2p3/2(at%) |       |
|------------|--------|--------|--------|-------------|------------|-------------|-----------|---------|--------------|-------|
|            |        |        | Total  | Pyridinic N | Pyrrolic N | Graphitic N | N- oxides |         | Co-O         | Co-N  |
| Co-N-C-100 | 76.17  | 13.97  | 8.92   | 40.32       | 18.55      | 34.68       | 6.45      | 0.94    | 91.74        | 8.26  |
| Co-N-C-20  | 73.56  | 10.81  | 14.90  | 49.26       | 6.90       | 37.44       | 6.40      | 0.73    | 86.21        | 13.79 |
| Co-N-C-5   | 75.95  | 20.96  | 2.49   | 25.37       | 36.76      | 34.56       | 3.31      | 0.60    | 93.46        | 6.54  |
